# Supplementary material for: Cell cycle gene regulation dynamics revealed by RNA velocity and deep-learning
Source: PubMed Central journal article supplement (PMC9126911; doi:10.1038/s41467-022-30545-8), 2022-05-23
Supplement: 41467_2022_30545_MOESM3_ESM.pdf [file 41467_2022_30545_MOESM3_ESM.pdf]

Title: Supplementary Data 1

Description: List of genes (n=158) presenting multiple maxima in the unspliced-spliced RNA space among which 13 are not yet considered in the GO term:cell\_cycle and could be added as potential markers of the cell cycle.
